# Supplementary material
Source: Springer Nature journal article supplement (https://www.springermedizin.de/resource/supplementary/13054_2012_1692_MOESM2_ESM.pdf/9711298)

A)

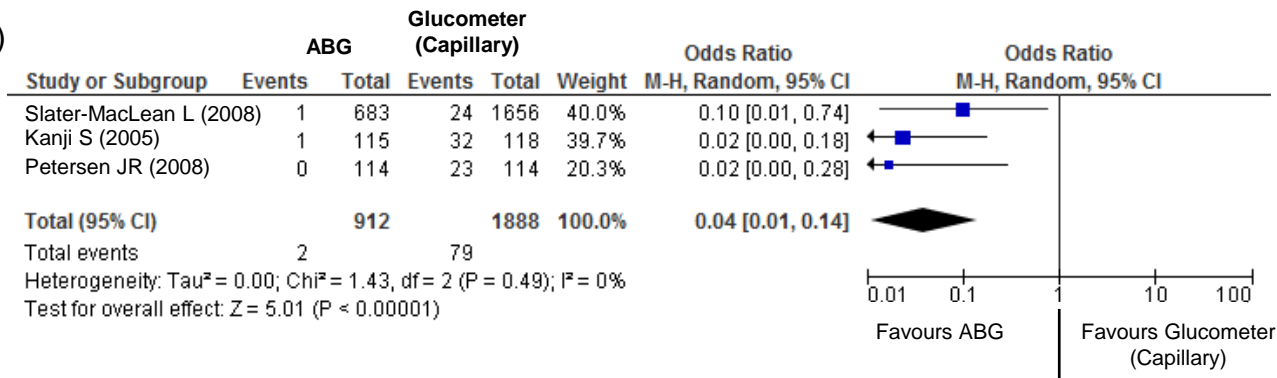

B)

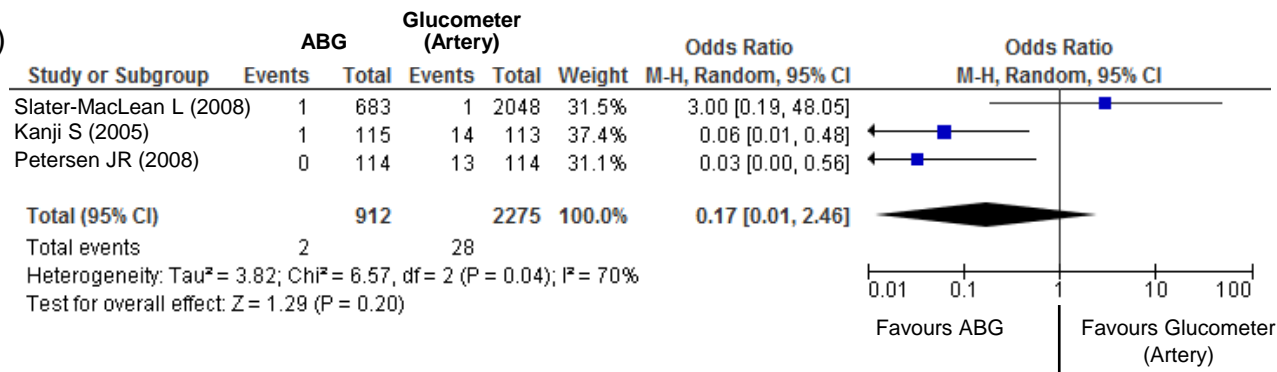

C)

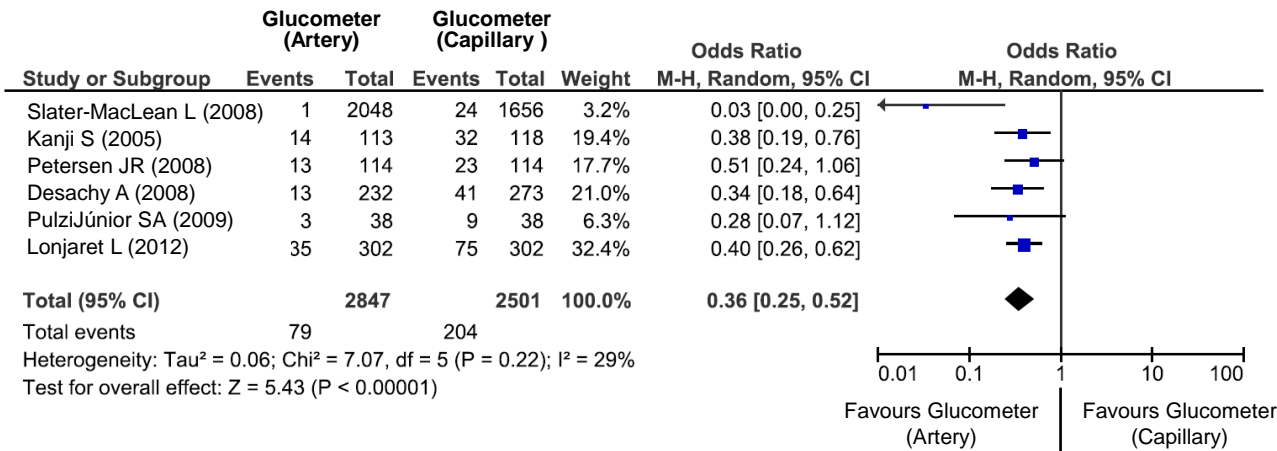

Supplement: MOESM2 [file 9711298]
